# Supplementary material for: Solution-state conformations of natural products from chiroptical spectroscopy: the case of isocorilagin
Source: Royal Society of Chemistry journal article supplement (doi:10.1039/c6ob00049e), 2016-01-01
Supplement: c6ob00049e1.pdf [file c6ob00049e1.pdf]

## Solution-state conformations of natural products from chiroptical spectroscopy: the case of isocorilagin

Ricardo F. Sprenger, Sérgio S. Thomasi, Antonio G. Ferreira, Quezia B. Cass\* and João M. Batista Jr.\*

*Department of Chemistry, Federal University of São Carlos – UFSCar, Rod.  
Washington Luís Km 235, São Carlos, SP 13565-905, Brazil*

### Supplementary Information

**Figure S1.**  $^1\text{H}$  NMR spectrum of corilagin in methanol- $d_4$ .

**Figure S2.**  $^1\text{H}$  NMR spectrum of corilagin in DMSO- $d_6$ .

**Table S1.**  $^1\text{H}$  NMR data for corilagin in methanol- $d_4$  and DMSO- $d_6$  at different temperatures.

**Figure S3.** Lowest-energy conformers of  $\alpha$ -configured corilagin.

**Figure S4.** Lowest-energy conformers of  $\beta$ -configured corilagin.

**Figure S5.** Experimental and calculated UV spectra of corilagin in MeOH.

**Figure S6.** Experimental and calculated ECD spectra of corilagin in DMSO.

**Figure S7.** Experimental and calculated UV spectra of corilagin in DMSO.

**Figure S8.** Calculated UV and ECD data of  $\alpha$ - and  $\beta$ -configured corilagin at the wB97XD/TZVP level.

**Figure S9.** Calculated UV and ECD data of  $\alpha$ - and  $\beta$ -configured corilagin at the B3LYP/TZVP level.

**Figure S10.** Calculated VCD spectra of  $\alpha$ -configured corilagin containing (aS)-HHDP moiety.

**Figure S11.** Calculated VCD spectra of  $\beta$ -configured corilagin containing (aS)-HHDP moiety.

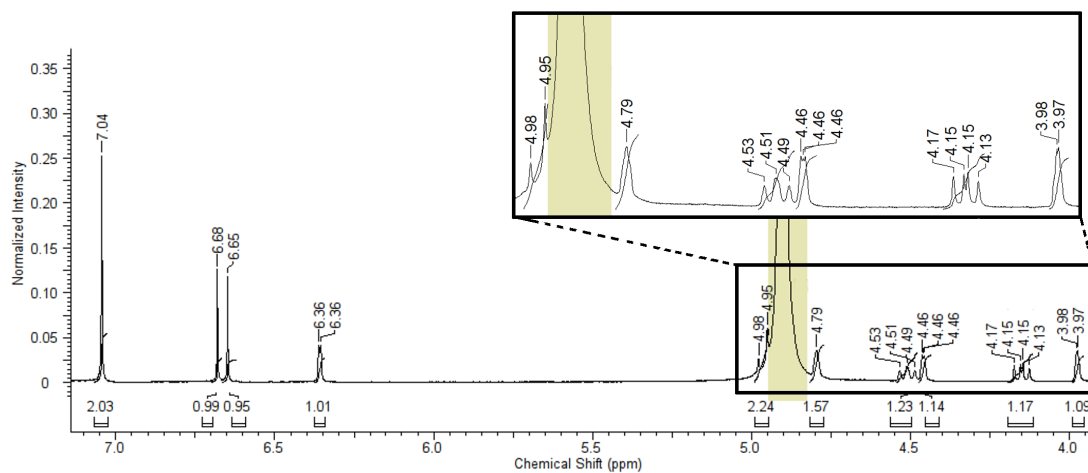

**Figure S1.**  $^1\text{H}$  NMR (400 MHz) spectrum of corilagin in methanol- $d_4$  (20°C).

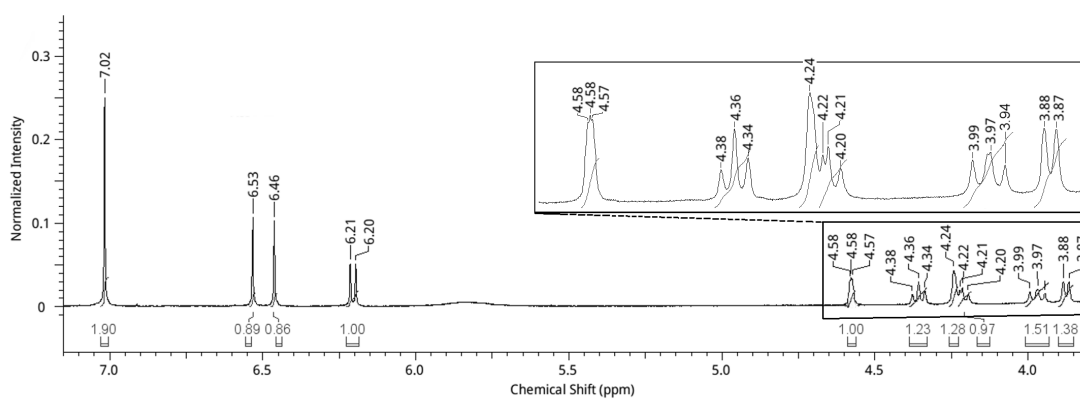

**Figure S2.**  $^1\text{H}$  NMR (400 MHz) spectrum of corilagin in DMSO- $d_6$  (20°C).

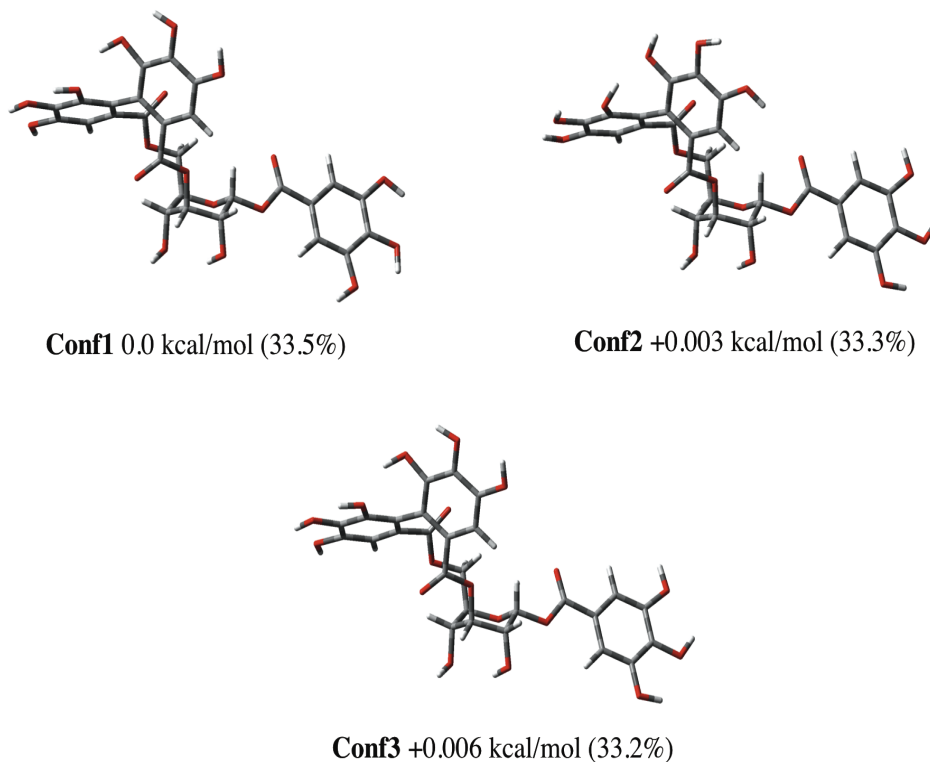

**Figure S3.** Optimized structures and relative energies of the three lowest-energy conformers of  $\alpha$ -configured corilagin at the CAM-B3LYP/PCM(MeOH)/TZVP level.

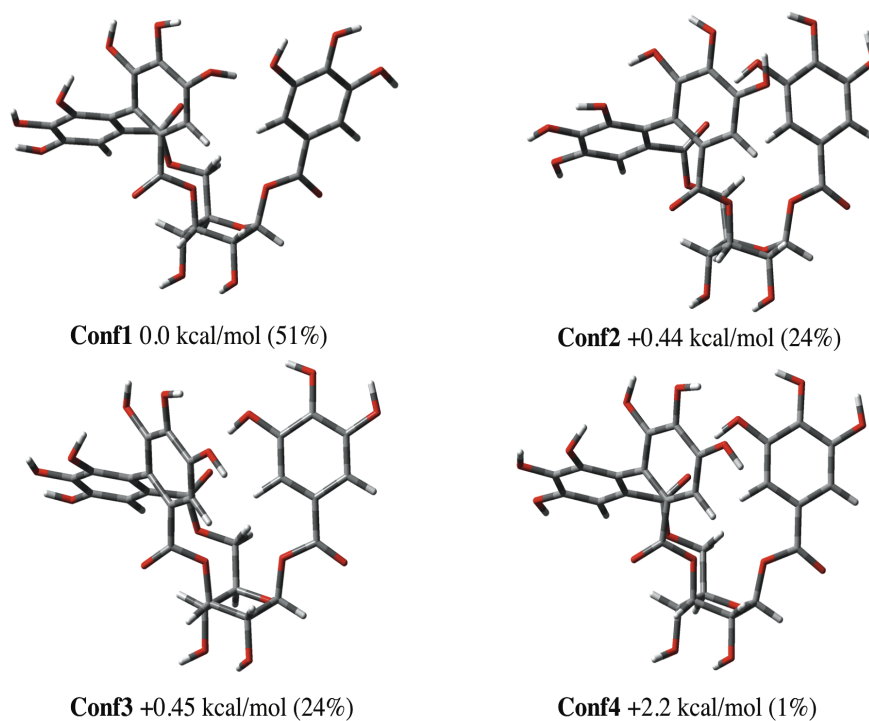

**Figure S4.** Optimized structures and relative energies of the four lowest-energy conformers of  $\beta$ -configured corilagin at the CAM-B3LYP/PCM(MeOH)/TZVP level.

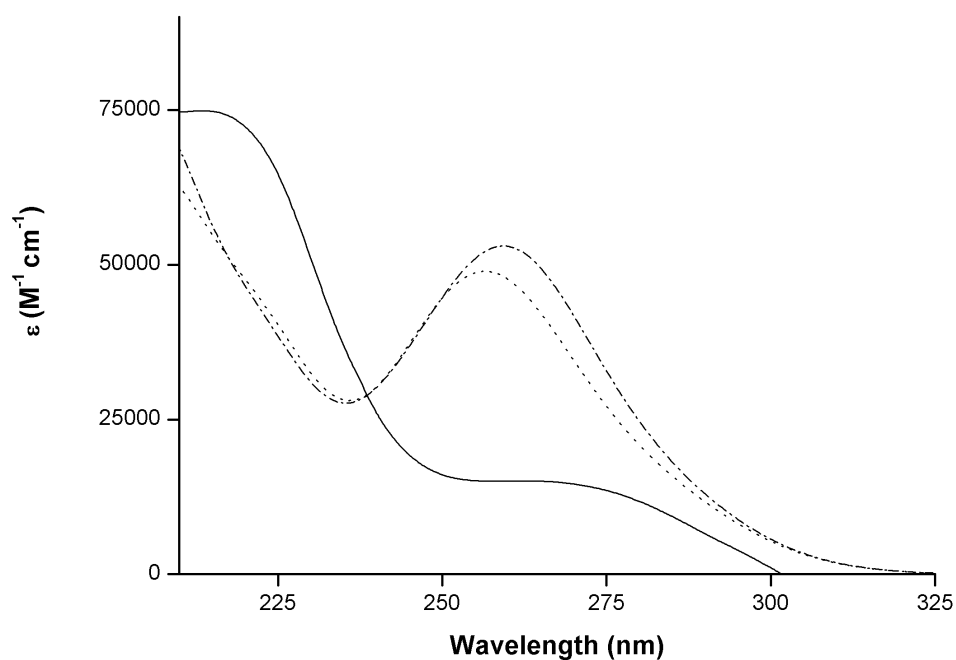

**Figure S5.** Experimental UV spectrum of corilagin in MeOH (solid line) and calculated [CAM-B3LYP/PCM(MeOH)/TZVP//B3LYP/PCM(MeOH)/6-31G(d)] UV spectra for the  $\beta$ -anomer (dotted line) and  $\alpha$ -anomer (dash-dotted line) of corilagin.

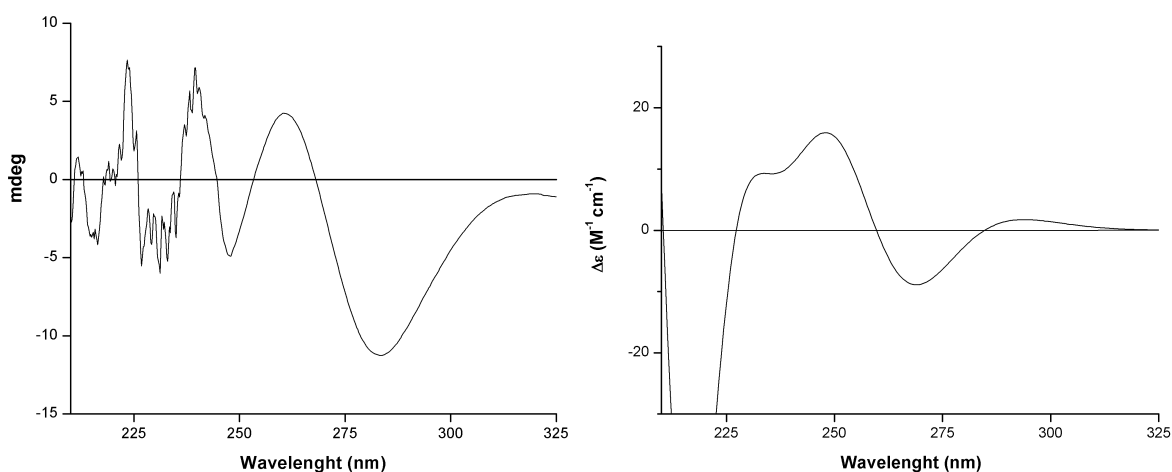

**Figure S6.** (Left) Experimental ECD spectrum of corilagin in DMSO. (Right) Calculated [CAM-B3LYP/PCM(DMSO)/TZVP//B3LYP/PCM(DMSO)/6-311G(d,p)] ECD spectra of the Boltzmann average of the lowest-energy conformers identified for  $\beta$ -configured corilagin.

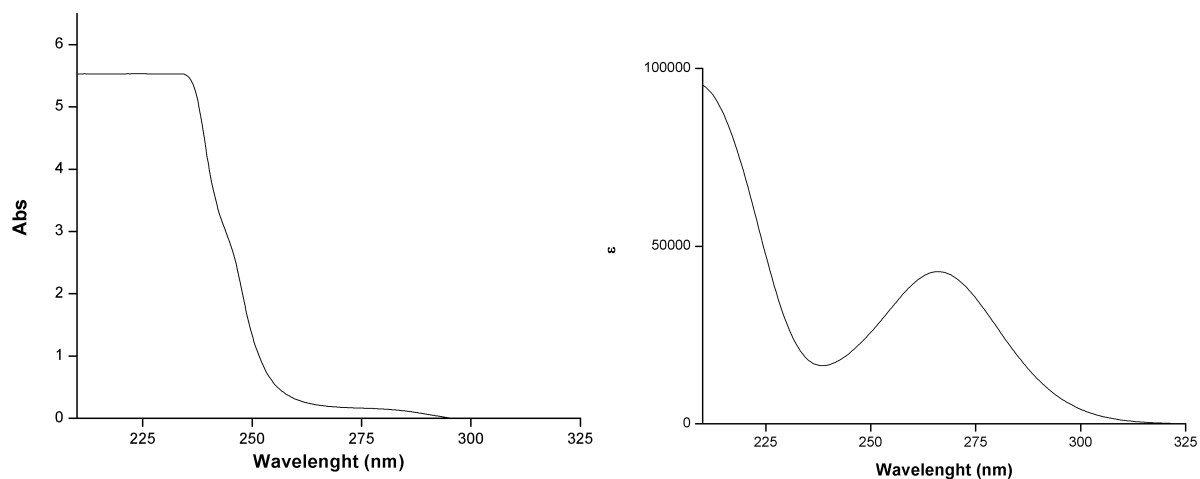

**Figure S7.** (Left) Experimental UV spectrum of corilagin in DMSO (Right) Calculated [CAM-B3LYP/PCM(DMSO)/TZVP//B3LYP/PCM(DMSO)/6-311G(d,p)] UV spectra of the Boltzmann average of the lowest-energy conformers identified for  $\beta$ -configured corilagin.

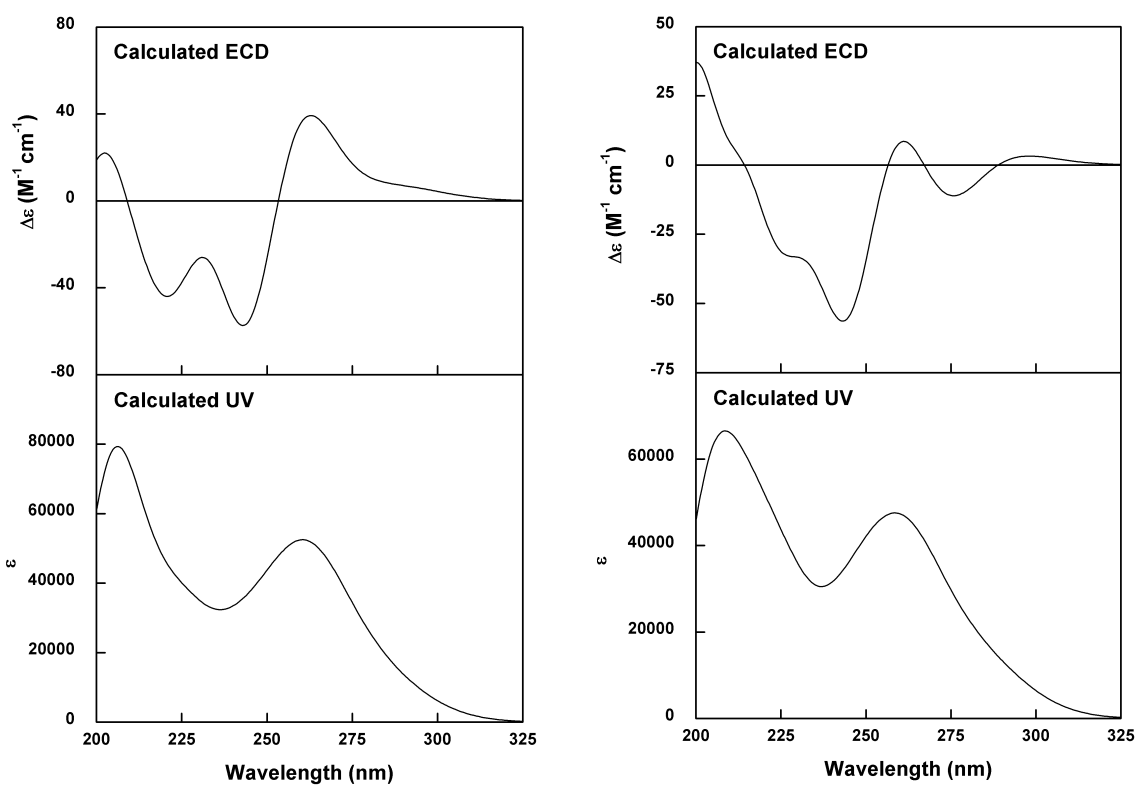

**Figure S8.** (Left) Calculated [wB97XD/PCM(MeOH)/TZVP//B3LYP/PCM(MeOH)/6-31G(d)] UV and ECD spectra of the Boltzmann average of the three lowest-energy conformers identified for  $\alpha$ -configured corilagin. (Right) Calculated [wB97XD/PCM(MeOH)/TZVP//B3LYP/PCM(MeOH)/6-31G(d)] UV and ECD spectra of the Boltzmann average of the four lowest-energy conformers identified for  $\beta$ -configured corilagin.

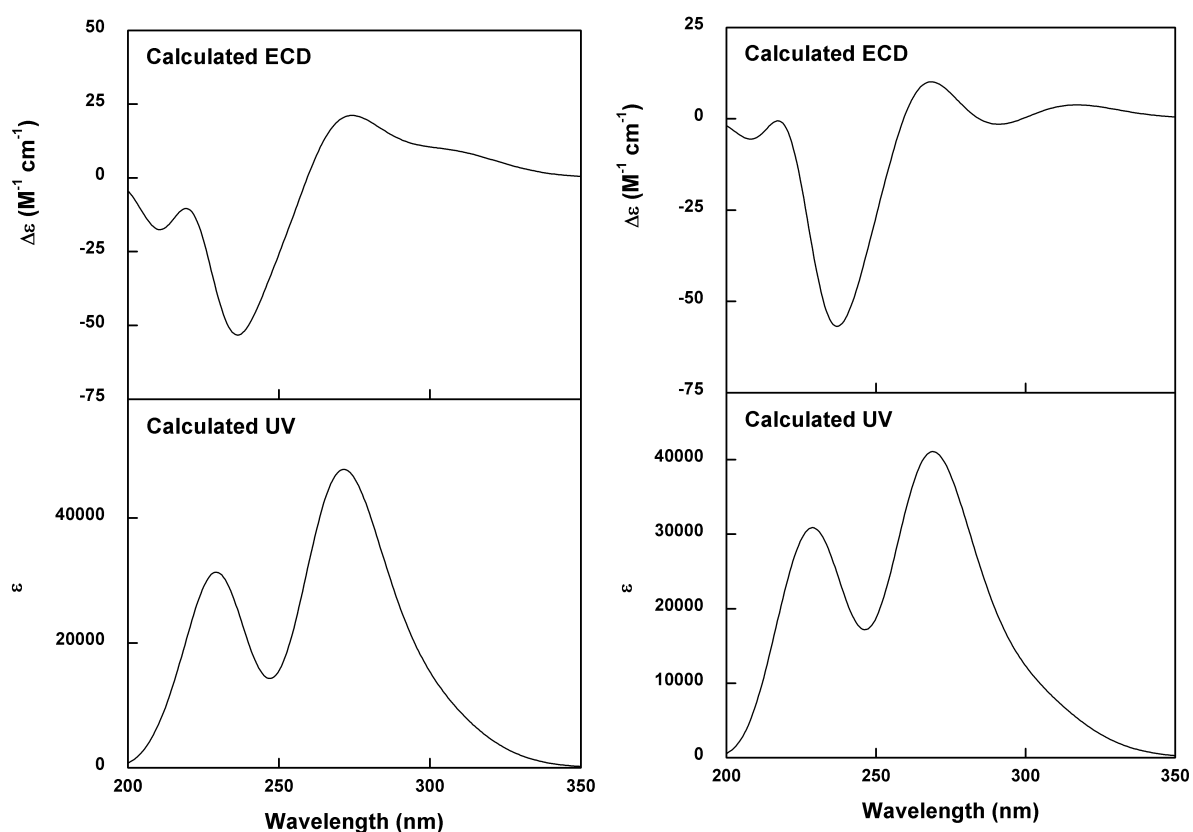

**Figure S9.** (Left) Calculated [B3LYP/PCM(MeOH)/TZVP//B3LYP/PCM(MeOH)/6-31G(d)] UV and ECD spectra of the Boltzmann average of the three lowest-energy conformers identified for  $\alpha$ -configured corilagin. (Right) Calculated [B3LYP/PCM(MeOH)/TZVP//B3LYP/PCM(MeOH)/6-31G(d)] UV and ECD spectra of the Boltzmann average of the four lowest-energy conformers identified for  $\beta$ -configured corilagin.

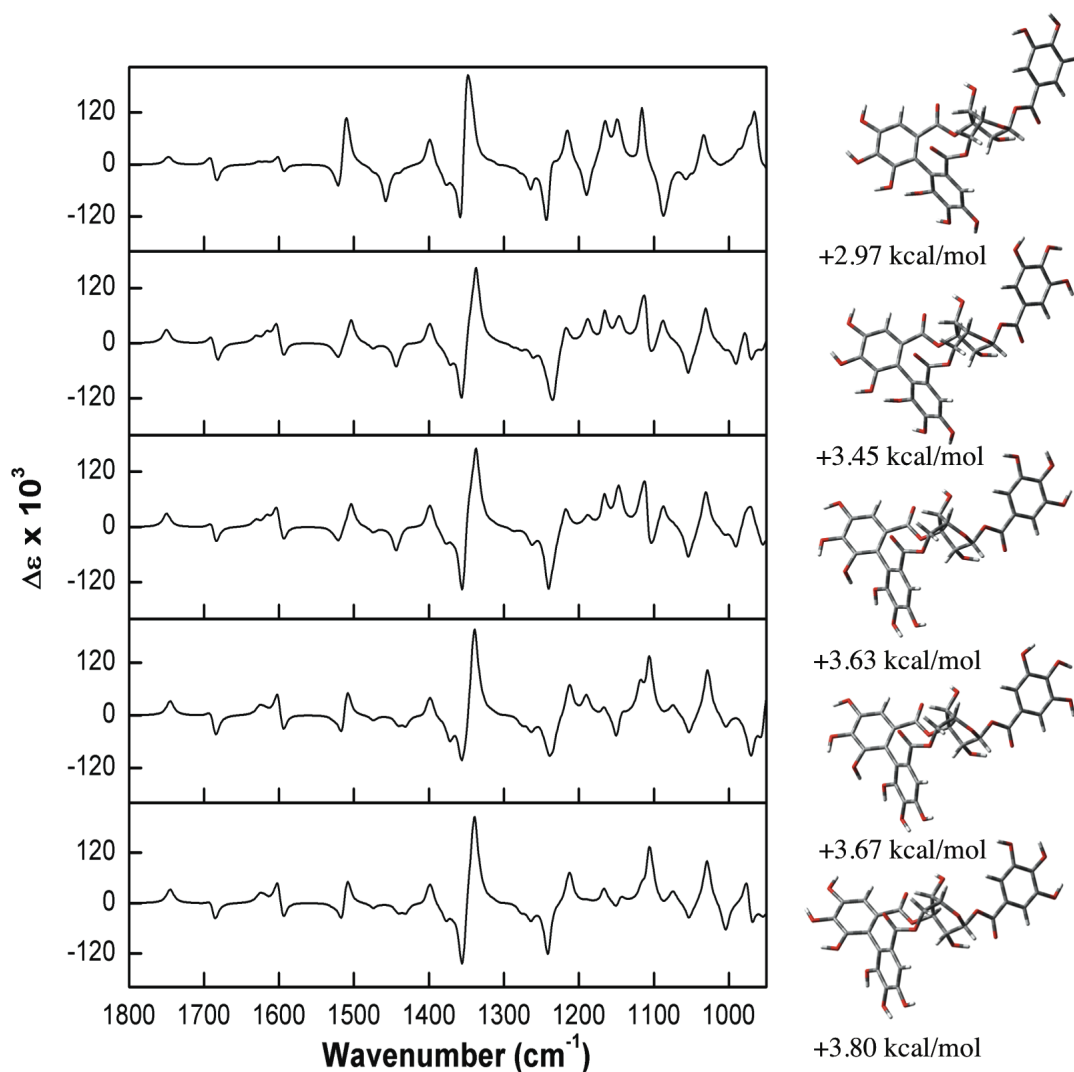

**Figure S10.** (Left) Calculated [B3LYP/PCM(MeOH)/ 6-31G(d)] VCD spectra of different conformers of  $\alpha$ -configured corilagin containing (aS)-HHDP moiety. (Right) Optimized structures and relative energies of different conformers of  $\alpha$ -configured corilagin containing (aS)-HHDP moiety.



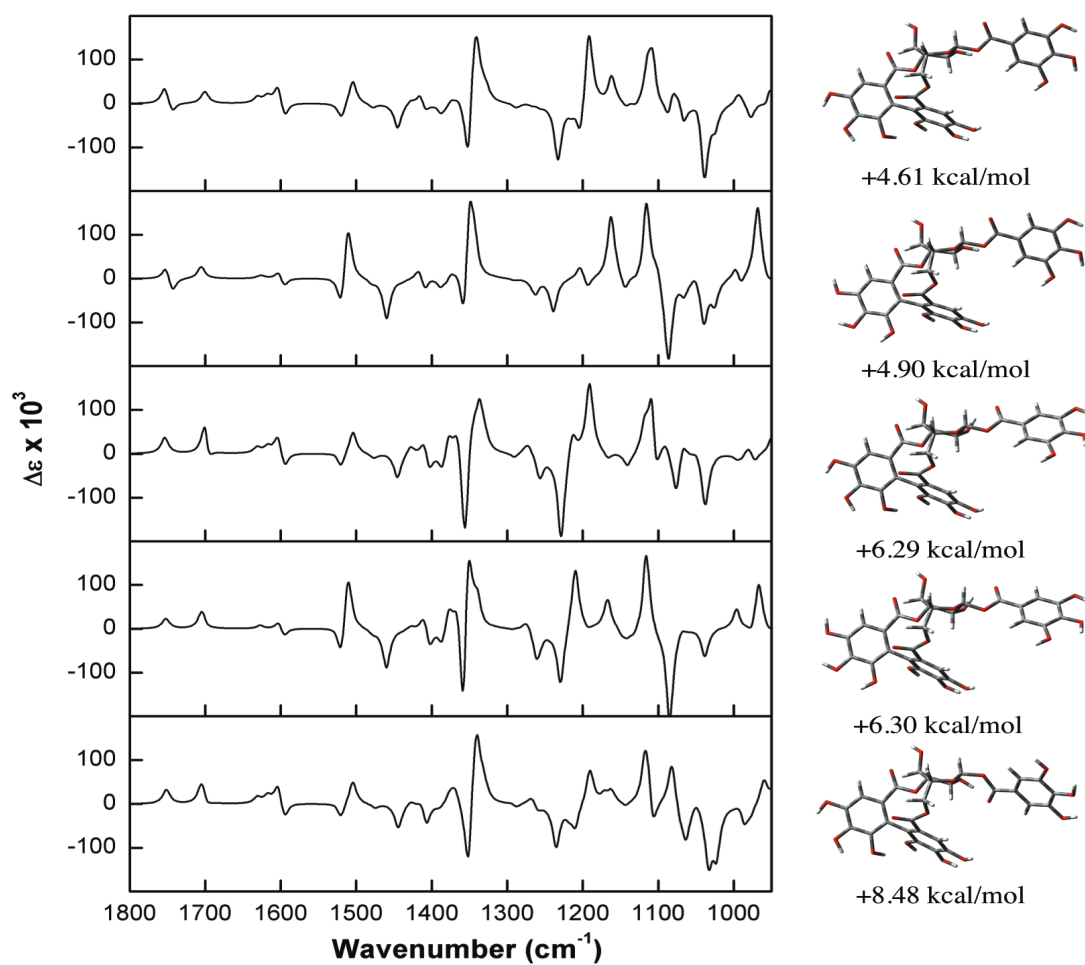

**Figure S11.** (Left) Calculated [B3LYP/PCM(MeOH)/ 6-31G(d)] VCD spectra of different conformers of  $\beta$ -configured corilagin containing (aS)-HHDP moiety. (Right) Optimized structures and relative energies of different conformers of  $\beta$ -configured corilagin containing (aS)-HHDP moiety.

**Conf1**  $\alpha$ -configured corilagin

# CAM-B3LYP/PCM(MeOH)/TZVP SPE

Total energy = -1503571.543 kcal/mol

|   |             |             |             |
|---|-------------|-------------|-------------|
| C | -0.04106800 | -2.38991900 | 0.91796800  |
| C | 0.65379000  | -2.33091900 | -0.45172000 |
| O | 2.01424900  | -1.90746900 | -0.33168000 |
| C | 1.68193300  | -0.74049800 | 1.78683300  |
| C | 2.20166800  | -0.66824800 | 0.34429600  |
| C | 0.18539200  | -1.11532800 | 1.76026200  |
| C | -0.07253300 | -1.49059900 | -1.52432800 |
| O | 0.55308400  | -3.51043300 | 1.59923000  |
| O | -0.52661000 | 0.01080200  | 1.20144800  |
| H | -0.16711200 | -1.28672300 | 2.78250000  |
| H | -1.10978600 | -2.55922200 | 0.77829600  |
| H | 1.80174800  | 0.24408700  | 2.25016600  |
| O | 2.40675000  | -1.65955200 | 2.57762600  |
| H | 1.72756700  | 0.15117900  | -0.20357000 |
| O | 3.59234600  | -0.45426400 | 0.39120100  |
| C | 4.16995900  | 0.12832300  | -0.70810700 |
| O | 3.53643800  | 0.50969600  | -1.66850200 |
| C | 5.63975400  | 0.23674800  | -0.54744500 |
| C | 6.36724100  | 0.84441100  | -1.57811700 |
| C | 7.74897200  | 0.96971900  | -1.46598200 |
| C | 8.39781300  | 0.48644900  | -0.32249800 |
| C | 7.66399400  | -0.11988700 | 0.70206000  |
| C | 6.28514300  | -0.25046700 | 0.60119100  |
| O | 8.46977900  | 1.55886700  | -2.46066900 |
| O | 9.75726100  | 0.63072200  | -0.25482500 |
| O | 8.42075400  | -0.55230000 | 1.76832200  |
| H | 0.72298600  | -3.36683200 | -0.79628100 |
| H | 5.85705800  | 1.21612000  | -2.45885400 |
| H | 5.70842400  | -0.72115600 | 1.39062800  |
| H | 9.40505400  | 1.54820000  | -2.19407100 |
| H | 10.05476800 | 0.25124900  | 0.58979100  |
| H | 7.84112900  | -0.95488500 | 2.43256400  |
| O | -1.49095900 | -1.72212500 | -1.39490700 |
| C | -2.30379000 | -0.64145700 | -1.57538100 |
| H | 0.11783100  | -0.42307500 | -1.42021200 |
| H | 0.25714800  | -1.79760100 | -2.52083300 |
| H | 0.05431400  | -3.65054600 | 2.42052100  |
| H | 2.22029800  | -2.54258700 | 2.20534700  |
| C | -1.88317800 | 0.04021200  | 1.38727300  |
| O | -1.93469000 | 0.39910400  | -2.06693700 |
| C | -3.68398100 | -0.92632700 | -1.07058100 |
| C | -4.27743300 | -2.14167700 | -1.43307200 |
| C | -5.59310900 | -2.40948600 | -1.07491300 |
| C | -6.31267600 | -1.46141000 | -0.34934800 |
| C | -5.70197300 | -0.27035500 | 0.04156000  |
| C | -4.37354100 | 0.03088900  | -0.28986800 |
| H | -3.70981300 | -2.86389200 | -2.01237100 |
| O | -6.28853000 | -3.55146300 | -1.38998600 |
| O | -7.61683700 | -1.65103600 | 0.02535900  |
| O | -6.44924900 | 0.63611000  | 0.76188900  |

|   |             |             |             |
|---|-------------|-------------|-------------|
| C | -3.73124600 | 1.28772100  | 0.19148800  |
| C | -4.30242400 | 2.53367900  | -0.10852300 |
| C | -3.64016500 | 3.72886700  | 0.18563500  |
| C | -2.37952500 | 3.71849600  | 0.78590700  |
| C | -1.80743000 | 2.49639500  | 1.12583100  |
| C | -2.48015700 | 1.29851900  | 0.85945100  |
| O | -5.51363900 | 2.70212000  | -0.74048100 |
| O | -4.20206000 | 4.93698600  | -0.11109500 |
| O | -1.73666600 | 4.88387500  | 1.06999400  |
| H | -0.84432000 | 2.48922500  | 1.62163200  |
| O | -2.48633300 | -0.85835900 | 1.93719500  |
| H | -5.71835200 | -4.15528100 | -1.88958500 |
| H | -7.89260400 | -2.53370700 | -0.27532400 |
| H | -7.31748400 | 0.22942500  | 0.93651100  |
| H | -6.15625700 | 2.09917800  | -0.31219300 |
| H | -5.06726400 | 4.74071500  | -0.51720800 |
| H | -2.29461500 | 5.61278800  | 0.74788600  |

### Conf2 $\alpha$ -configured corilagin

# CAM-B3LYP/PCM(MeOH)/TZVP SPE

Total energy = -1503571.540 kcal/mol

|   |             |             |             |
|---|-------------|-------------|-------------|
| C | -0.06095100 | -2.41191300 | 0.90175000  |
| C | 0.66033300  | -2.35188600 | -0.45469600 |
| O | 2.01820900  | -1.92297500 | -0.30834900 |
| C | 1.64664800  | -0.76361400 | 1.80677600  |
| C | 2.18620100  | -0.68662800 | 0.37212600  |
| C | 0.15163100  | -1.14196600 | 1.75513700  |
| C | -0.04691500 | -1.51849200 | -1.54560000 |
| O | 0.52092600  | -3.53164100 | 1.59269100  |
| O | -0.55980700 | -0.01160200 | 1.19489300  |
| H | -0.21470100 | -1.32041600 | 2.77073100  |
| H | -1.12689900 | -2.58089200 | 0.73929600  |
| H | 1.75633800  | 0.22149800  | 2.27264600  |
| O | 2.35826100  | -1.67840200 | 2.60994000  |
| H | 1.71226200  | 0.13089200  | -0.17912800 |
| O | 3.57674500  | -0.46003200 | 0.43464800  |
| C | 4.15351500  | 0.14121800  | -0.64938500 |
| O | 3.52086300  | 0.54991900  | -1.60184800 |
| C | 5.62517200  | 0.24318600  | -0.50113100 |
| C | 6.33204900  | 0.86095500  | -1.54496500 |
| C | 7.71120500  | 0.97773900  | -1.45089400 |
| C | 8.38745000  | 0.48770800  | -0.32828600 |
| C | 7.67857200  | -0.12707600 | 0.71100800  |
| C | 6.29333200  | -0.25149900 | 0.62660100  |
| O | 8.52370400  | 1.55751900  | -2.39945000 |
| O | 9.74659600  | 0.58364300  | -0.20008800 |
| O | 8.34356400  | -0.60332400 | 1.80051800  |
| H | 0.74042500  | -3.38861500 | -0.79318300 |
| H | 5.78658900  | 1.23353300  | -2.40686600 |
| H | 5.74939800  | -0.73193700 | 1.43037400  |
| H | 7.98592300  | 1.84773600  | -3.15152500 |
| H | 10.09174100 | 1.01417000  | -1.00093800 |
| H | 9.29162600  | -0.43214200 | 1.66698000  |

|   |             |             |             |
|---|-------------|-------------|-------------|
| O | -1.46429000 | -1.74737400 | -1.44213200 |
| C | -2.27260700 | -0.65411300 | -1.57009300 |
| H | 0.14480300  | -0.45044800 | -1.44744100 |
| H | 0.30082200  | -1.83561400 | -2.53287900 |
| H | -0.01630500 | -3.70170500 | 2.38337800  |
| H | 2.18021100  | -2.56431900 | 2.24050800  |
| C | -1.91225800 | 0.02259000  | 1.39408400  |
| O | -1.88375000 | 0.41079900  | -1.99765900 |
| C | -3.65318100 | -0.94696800 | -1.08605600 |
| C | -4.22711700 | -2.18059800 | -1.41177000 |
| C | -5.54324300 | -2.46092400 | -1.05690700 |
| C | -6.28185500 | -1.48853100 | -0.37854800 |
| C | -5.70418400 | -0.26551900 | -0.02939900 |
| C | -4.36870200 | 0.02832700  | -0.34669700 |
| H | -3.66161500 | -2.92223600 | -1.96335800 |
| O | -6.11136400 | -3.65146300 | -1.39427600 |
| O | -7.58124900 | -1.76985900 | -0.06491200 |
| O | -6.54110500 | 0.57702200  | 0.66752000  |
| C | -3.72735700 | 1.28067000  | 0.14675300  |
| C | -4.28405800 | 2.53083500  | -0.15325100 |
| C | -3.65866800 | 3.72677100  | 0.19952300  |
| C | -2.42719200 | 3.70455600  | 0.85115100  |
| C | -1.85376300 | 2.48373900  | 1.18498100  |
| C | -2.50734200 | 1.28730600  | 0.86412000  |
| O | -5.49061200 | 2.60166600  | -0.81438800 |
| O | -4.29069200 | 4.89149200  | -0.14568500 |
| O | -1.89375800 | 4.93914400  | 1.13017800  |
| H | -0.90685500 | 2.45261600  | 1.71503700  |
| O | -2.51718000 | -0.85781600 | 1.96513800  |
| H | -7.02571100 | -3.64371200 | -1.06206800 |
| H | -7.92684200 | -0.97829100 | 0.38897100  |
| H | -6.45348600 | 1.46962300  | 0.27314800  |
| H | -5.67754900 | 3.54246200  | -0.98648200 |
| H | -3.70582400 | 5.63266200  | 0.08775500  |
| H | -1.00513300 | 4.83617200  | 1.50314300  |

### Conf3 $\alpha$ -configured corilagin

# CAM-B3LYP/PCM(MeOH)/TZVP SPE

Total energy = -1503571.536 Kcal/mol

|   |             |             |             |
|---|-------------|-------------|-------------|
| C | -0.05905500 | -2.41456200 | 0.91988000  |
| C | 0.64760200  | -2.34537200 | -0.44340600 |
| O | 2.00852200  | -1.92725100 | -0.30949600 |
| C | 1.66675800  | -0.78362800 | 1.82041800  |
| C | 2.19480700  | -0.69680200 | 0.38226500  |
| C | 0.16796200  | -1.14956400 | 1.77636400  |
| C | -0.06602100 | -1.49312500 | -1.51504100 |
| O | 0.52224500  | -3.54623800 | 1.59136600  |
| O | -0.53297700 | -0.01395700 | 1.22053000  |
| H | -0.19489500 | -1.32743700 | 2.79380800  |
| H | -1.12784100 | -2.57496600 | 0.76939100  |
| H | 1.78764800  | 0.19521200  | 2.29550900  |
| O | 2.37872300  | -1.71354000 | 2.60705700  |
| H | 1.72391200  | 0.12963200  | -0.15760000 |

|   |             |             |             |
|---|-------------|-------------|-------------|
| O | 3.58718800  | -0.48479800 | 0.43404400  |
| C | 4.16064900  | 0.10822400  | -0.65673500 |
| O | 3.52563600  | 0.50029700  | -1.61425500 |
| C | 5.63148900  | 0.22220500  | -0.50860900 |
| C | 6.33219100  | 0.84898500  | -1.55109800 |
| C | 7.70991900  | 0.98040000  | -1.45610300 |
| C | 8.39106500  | 0.49345300  | -0.33527800 |
| C | 7.68852600  | -0.13160300 | 0.70222600  |
| C | 6.30438500  | -0.26861400 | 0.61791300  |
| O | 8.51621300  | 1.57212900  | -2.40285200 |
| O | 9.74933500  | 0.60358200  | -0.20635700 |
| O | 8.35863400  | -0.60396000 | 1.79025500  |
| H | 0.71637800  | -3.37849400 | -0.79628800 |
| H | 5.78282900  | 1.21900200  | -2.41161300 |
| H | 5.76490900  | -0.75373300 | 1.42186600  |
| H | 7.97078100  | 1.88745600  | -3.13915000 |
| H | 10.08782200 | 1.05475400  | -0.99860500 |
| H | 9.30394500  | -0.41575500 | 1.66032200  |
| O | -1.48677900 | -1.71707100 | -1.39870300 |
| C | -2.29199500 | -0.63092400 | -1.57744300 |
| H | 0.13002900  | -0.42759800 | -1.40150400 |
| H | 0.26926100  | -1.79468500 | -2.51141000 |
| H | 0.03295800  | -3.67851300 | 2.41965200  |
| H | 2.21239200  | -2.59035300 | 2.21222900  |
| C | -1.89019700 | 0.02404700  | 1.39526200  |
| O | -1.91380600 | 0.41083800  | -2.05991000 |
| C | -3.67727000 | -0.91122100 | -1.08403600 |
| C | -4.27520000 | -2.12079100 | -1.45818800 |
| C | -5.59469800 | -2.38335900 | -1.11030200 |
| C | -6.31387800 | -1.43550700 | -0.38406100 |
| C | -5.69902900 | -0.25042200 | 0.01838100  |
| C | -4.36654700 | 0.04484100  | -0.30173900 |
| H | -3.70781700 | -2.84280100 | -2.03798600 |
| O | -6.29440100 | -3.51950500 | -1.43694700 |
| O | -7.62156800 | -1.62002400 | -0.01914200 |
| O | -6.44574900 | 0.65578800  | 0.73956000  |
| C | -3.71948400 | 1.29370400  | 0.19358500  |
| C | -4.28028400 | 2.54558100  | -0.10122600 |
| C | -3.61230900 | 3.73393400  | 0.20682700  |
| C | -2.35645600 | 3.71053900  | 0.81664100  |
| C | -1.79516000 | 2.48214500  | 1.15206600  |
| C | -2.47374900 | 1.29085000  | 0.87141600  |
| O | -5.48586200 | 2.72664700  | -0.74085200 |
| O | -4.16396100 | 4.94818900  | -0.08521800 |
| O | -1.70804700 | 4.86977800  | 1.11388800  |
| H | -0.83639800 | 2.46462300  | 1.65600100  |
| O | -2.50566300 | -0.87338700 | 1.93316000  |
| H | -5.72107300 | -4.12801100 | -1.92714900 |
| H | -7.89857300 | -2.50144800 | -0.32232200 |
| H | -7.31686500 | 0.25243500  | 0.90743000  |
| H | -6.13555100 | 2.12524500  | -0.32105100 |
| H | -5.02821300 | 4.76031200  | -0.49728700 |
| H | -2.26123400 | 5.60451300  | 0.79686500  |

**Conf1**  $\beta$ -configured corilagin

# CAM-B3LYP/PCM(MeOH)/TZVP SPE

Total energy = -1503574.675 kcal/mol

|   |             |             |             |
|---|-------------|-------------|-------------|
| C | 0.76952900  | 3.42727600  | 0.54463900  |
| C | -0.07954500 | 3.47827000  | -0.72993800 |
| O | -1.44941400 | 3.83156900  | -0.47142200 |
| C | -1.33621500 | 3.06453600  | 1.88392900  |
| C | -2.13434000 | 3.19864700  | 0.57129700  |
| C | 0.11223900  | 2.59571900  | 1.66312600  |
| C | -0.01858300 | 2.20267200  | -1.59272300 |
| O | 0.90085700  | 4.78980600  | 0.99764400  |
| O | 0.10569200  | 1.19015200  | 1.32653400  |
| H | 0.67199800  | 2.73116800  | 2.59324600  |
| H | 1.75119400  | 3.02111900  | 0.29874100  |
| H | -1.86043200 | 2.34943600  | 2.52405700  |
| O | -1.33505400 | 4.30734800  | 2.56354100  |
| H | -3.01496300 | 3.81539900  | 0.74616200  |
| O | -2.58476700 | 1.86976200  | 0.20844400  |
| C | -3.81978600 | 1.77153000  | -0.35802700 |
| O | -4.49075400 | 2.72805200  | -0.68607100 |
| C | -4.26580100 | 0.35789800  | -0.48920400 |
| C | -5.50999300 | 0.13802000  | -1.09914200 |
| C | -6.00116800 | -1.15557000 | -1.20193300 |
| C | -5.26634800 | -2.22859000 | -0.68563800 |
| C | -4.02966200 | -1.99934800 | -0.07808000 |
| C | -3.51562200 | -0.71129800 | 0.01783200  |
| O | -7.19824300 | -1.50902600 | -1.77656200 |
| O | -5.71149000 | -3.51997100 | -0.74983400 |
| O | -3.33671400 | -3.07531500 | 0.42925400  |
| H | 0.30127900  | 4.32259400  | -1.31164100 |
| H | -6.07007600 | 0.98985700  | -1.47315300 |
| H | -2.54736900 | -0.54373300 | 0.47262100  |
| H | -7.64776200 | -0.71696500 | -2.10843500 |
| H | -6.56986800 | -3.52110300 | -1.20761300 |
| H | -3.84917500 | -3.87905000 | 0.23047900  |
| O | 1.35877100  | 1.78484900  | -1.64673300 |
| C | 1.58736800  | 0.43928200  | -1.61318100 |
| H | -0.62189300 | 1.39970900  | -1.17411600 |
| H | -0.37999200 | 2.42203000  | -2.60211600 |
| H | 1.63272700  | 4.81480100  | 1.63515800  |
| H | -0.73316800 | 4.89090400  | 2.06048200  |
| C | 1.30241700  | 0.53552600  | 1.45210000  |
| O | 0.72575600  | -0.38183600 | -1.83813200 |
| C | 2.99944000  | 0.14477600  | -1.22741900 |
| C | 4.02495300  | 0.89516400  | -1.81249500 |
| C | 5.35698900  | 0.59797300  | -1.53922100 |
| C | 5.65096000  | -0.46306300 | -0.67938500 |
| C | 4.62884600  | -1.19771600 | -0.07404400 |
| C | 3.27833100  | -0.89532900 | -0.30607800 |
| H | 3.79586200  | 1.69963700  | -2.50160800 |
| O | 6.35867700  | 1.30994300  | -2.12670700 |
| O | 6.96490000  | -0.75990700 | -0.44921200 |
| O | 5.06793700  | -2.19199000 | 0.77064800  |

|   |             |             |             |
|---|-------------|-------------|-------------|
| C | 2.19353700  | -1.60333000 | 0.43209300  |
| C | 2.08884900  | -2.99672500 | 0.36468500  |
| C | 0.99402900  | -3.67890700 | 0.89731000  |
| C | -0.04740600 | -2.97755900 | 1.50148500  |
| C | 0.05659700  | -1.59769800 | 1.64566800  |
| C | 1.17164300  | -0.91835500 | 1.13885000  |
| O | 3.07266400  | -3.73050500 | -0.26391700 |
| O | 0.95684700  | -5.03682100 | 0.75534200  |
| O | -1.09473000 | -3.74220000 | 1.96277200  |
| H | -0.71423600 | -1.05415800 | 2.18048400  |
| O | 2.31940600  | 1.09311500  | 1.80508600  |
| H | 7.20197000  | 0.94036000  | -1.81250800 |
| H | 6.96620300  | -1.52738000 | 0.15326900  |
| H | 4.54141300  | -2.99521200 | 0.57618700  |
| H | 2.79102900  | -4.66317900 | -0.25930600 |
| H | 0.09828200  | -5.32258700 | 1.12104600  |
| H | -1.93328000 | -3.37264600 | 1.61415600  |

### Conf2 $\beta$ -configured corilagin

# CAM-B3LYP/PCM(MeOH)/TZVP SPE

Total energy = -1503574.234 kcal/mol

|   |             |             |             |
|---|-------------|-------------|-------------|
| C | 0.17192200  | 3.62024200  | 0.20681200  |
| C | -0.77093300 | 3.39870900  | -0.98328100 |
| O | -2.14905900 | 3.62886000  | -0.65215100 |
| C | -1.79173800 | 3.26072300  | 1.76089000  |
| C | -2.67230300 | 3.03213400  | 0.51843200  |
| C | -0.30973800 | 2.92907100  | 1.49764800  |
| C | -0.62461200 | 2.03450300  | -1.69793400 |
| O | 0.19459100  | 5.04398700  | 0.42202200  |
| O | -0.16556700 | 1.49499400  | 1.40499700  |
| H | 0.28894800  | 3.28616900  | 2.34182400  |
| H | 1.17059400  | 3.26721000  | -0.05567400 |
| H | -2.17084600 | 2.62426400  | 2.56515900  |
| O | -1.90886200 | 4.60114300  | 2.20165400  |
| H | -3.64985700 | 3.49259000  | 0.66069900  |
| O | -2.83034700 | 1.62437000  | 0.34652200  |
| C | -4.06758100 | 1.12117500  | 0.00513600  |
| O | -5.08044900 | 1.78584300  | 0.02490500  |
| C | -3.95729700 | -0.29995500 | -0.39641800 |
| C | -5.10918300 | -0.97843300 | -0.81960800 |
| C | -5.00007200 | -2.28783400 | -1.28068800 |
| C | -3.74085600 | -2.90334200 | -1.34484700 |
| C | -2.59582200 | -2.22062800 | -0.92339700 |
| C | -2.70535300 | -0.93221900 | -0.41943900 |
| O | -6.10785200 | -2.96321800 | -1.70306000 |
| O | -3.67287900 | -4.17378600 | -1.84886500 |
| O | -1.41111900 | -2.90157900 | -1.04795300 |
| H | -0.53738700 | 4.19780900  | -1.69300600 |
| H | -6.07460200 | -0.48607900 | -0.80574200 |
| H | -1.82324000 | -0.42679600 | -0.05628100 |
| H | -5.81789400 | -3.84071600 | -2.00588100 |
| H | -2.72912700 | -4.41233000 | -1.88454000 |
| H | -0.68106300 | -2.25371700 | -1.09456800 |

|   |             |             |             |
|---|-------------|-------------|-------------|
| O | 0.77760100  | 1.66659500  | -1.72626600 |
| C | 1.09264600  | 0.37196200  | -1.49326500 |
| H | -1.18742900 | 1.25888300  | -1.19142600 |
| H | -0.98569400 | 2.11526200  | -2.72707300 |
| H | 0.89512300  | 5.23022400  | 1.06839000  |
| H | -1.46622000 | 5.15168300  | 1.52752800  |
| C | 1.09667100  | 0.98663600  | 1.51820400  |
| O | 0.27751500  | -0.53100200 | -1.50891900 |
| C | 2.55325900  | 0.21324800  | -1.22051500 |
| C | 3.45089600  | 0.87923700  | -2.06558700 |
| C | 4.81900800  | 0.69113700  | -1.91443200 |
| C | 5.28847900  | -0.16075500 | -0.91479300 |
| C | 4.38980400  | -0.78944200 | -0.05343300 |
| C | 3.00357000  | -0.61334000 | -0.16441800 |
| H | 3.07116000  | 1.52565200  | -2.85104800 |
| O | 5.79381200  | 1.26760300  | -2.68979400 |
| O | 6.62044900  | -0.40395900 | -0.71756900 |
| O | 4.89525500  | -1.61785000 | 0.92298000  |
| C | 2.07294000  | -1.24361000 | 0.81475800  |
| C | 2.07841500  | -2.63556400 | 0.99900700  |
| C | 1.10886500  | -3.27145200 | 1.77957000  |
| C | 0.09805700  | -2.53460000 | 2.40250900  |
| C | 0.09595900  | -1.14876700 | 2.26818800  |
| C | 1.07991200  | -0.50550500 | 1.50758500  |
| O | 2.98267400  | -3.49119000 | 0.41126500  |
| O | 1.11710600  | -4.62418800 | 1.95161900  |
| O | -0.84398900 | -3.15259400 | 3.16099400  |
| H | -0.66938200 | -0.57523500 | 2.77679300  |
| O | 2.08369200  | 1.68568200  | 1.62570400  |
| H | 5.38992300  | 1.85662200  | -3.34502600 |
| H | 7.12550900  | 0.13555500  | -1.34982700 |
| H | 5.86761400  | -1.56723400 | 0.88074500  |
| H | 3.87547400  | -3.10710500 | 0.53539700  |
| H | 1.88497400  | -4.95927800 | 1.45178300  |
| H | -0.68664200 | -4.11111500 | 3.10699500  |

### Conf3 $\beta$ -configured corilagin

# CAM-B3LYP/PCM(MeOH)/TZVP SPE

Total energy = -1503574.227 kcal/mol

|   |             |            |             |
|---|-------------|------------|-------------|
| C | 0.30810600  | 3.63650600 | 0.19712200  |
| C | -0.61357100 | 3.46982900 | -1.01900700 |
| O | -1.99496800 | 3.73005800 | -0.71371800 |
| C | -1.70204100 | 3.32785900 | 1.70131100  |
| C | -2.55925500 | 3.13860600 | 0.43546400  |
| C | -0.22834400 | 2.94403600 | 1.46550500  |
| C | -0.48584900 | 2.12129200 | -1.76809500 |
| O | 0.37603000  | 5.05408000 | 0.44110300  |
| O | -0.13970100 | 1.50564300 | 1.34829200  |
| H | 0.36595100  | 3.26121300 | 2.32808600  |
| H | 1.29897200  | 3.25150300 | -0.05025200 |
| H | -2.12223000 | 2.69605800 | 2.48928600  |
| O | -1.78331600 | 4.66478200 | 2.15563500  |
| H | -3.53025200 | 3.61738000 | 0.56231300  |



|   |             |             |             |
|---|-------------|-------------|-------------|
| O | -2.74487100 | 1.73280500  | 0.24383200  |
| C | -3.99913700 | 1.23292300  | -0.01426000 |
| O | -5.01061100 | 1.89576900  | 0.06193900  |
| C | -3.91251500 | -0.19697200 | -0.39920900 |
| C | -5.08335400 | -0.88909600 | -0.73844800 |
| C | -4.99330100 | -2.20778900 | -1.17935100 |
| C | -3.73692500 | -2.82120500 | -1.30233800 |
| C | -2.57285200 | -2.12484700 | -0.96280400 |
| C | -2.66151700 | -0.82528000 | -0.48334000 |
| O | -6.12035300 | -2.89583200 | -1.52066300 |
| O | -3.69288800 | -4.10274800 | -1.78110000 |
| O | -1.39066900 | -2.79978300 | -1.13551900 |
| H | -0.34263900 | 4.28094200  | -1.70054600 |
| H | -6.04933700 | -0.40088800 | -0.68052400 |
| H | -1.76130700 | -0.30472600 | -0.19652400 |
| H | -5.84413100 | -3.76980100 | -1.84598600 |
| H | -2.75268300 | -4.32539200 | -1.90469400 |
| H | -0.66849700 | -2.14532200 | -1.23182400 |
| O | 0.89944800  | 1.70484300  | -1.75085400 |
| C | 1.16550900  | 0.39855900  | -1.51623400 |
| H | -1.09846600 | 1.35430700  | -1.30812900 |
| H | -0.80128600 | 2.24572200  | -2.80782200 |
| H | 1.10208200  | 5.21069900  | 1.06666400  |
| H | -1.28410200 | 5.20545800  | 1.51328000  |
| C | 1.09249000  | 0.94152800  | 1.50907800  |
| O | 0.31011600  | -0.47047900 | -1.56291600 |
| C | 2.60164300  | 0.18260100  | -1.18666200 |
| C | 3.56342400  | 0.86672100  | -1.93935700 |
| C | 4.91855100  | 0.63133600  | -1.72857200 |
| C | 5.30069600  | -0.30262800 | -0.76154900 |
| C | 4.34368200  | -0.96710500 | 0.00987800  |
| C | 2.97267400  | -0.72027800 | -0.15811400 |
| H | 3.26589300  | 1.56669600  | -2.71111400 |
| O | 5.85433700  | 1.27573900  | -2.47656500 |
| O | 6.63309000  | -0.54221600 | -0.59284700 |
| O | 4.86828000  | -1.82737500 | 0.94571900  |
| C | 1.96985400  | -1.32306200 | 0.76496900  |
| C | 1.88974000  | -2.71399000 | 0.91650800  |
| C | 0.87824000  | -3.32247100 | 1.66000700  |
| C | -0.10460500 | -2.54335900 | 2.26878100  |
| C | -0.03376900 | -1.15850100 | 2.17509800  |
| C | 1.00351700  | -0.55150200 | 1.45425000  |
| O | 2.82593300  | -3.52134800 | 0.30910600  |
| O | 0.88356500  | -4.68763100 | 1.72749100  |
| O | -1.06462200 | -3.24718800 | 2.94900700  |
| H | -0.77665100 | -0.54066200 | 2.66889400  |
| O | 2.10035100  | 1.58656900  | 1.69860400  |
| H | 6.72956000  | 0.96972300  | -2.18160000 |
| H | 6.70299700  | -1.22011100 | 0.10551500  |
| H | 4.34871600  | -2.65708200 | 0.90972800  |
| H | 2.56848700  | -4.44702000 | 0.47357000  |
| H | 0.05983700  | -4.97025900 | 2.16182700  |
| H | -1.81068600 | -2.66621500 | 3.16371100  |

### Conf4 $\beta$ -configured corilagin

# CAM-B3LYP/PCM(MeOH)/TZVP SPE

Total energy = -1503572.386 kcal/mol

|   |             |             |             |
|---|-------------|-------------|-------------|
| C | 0.32664500  | 3.62244100  | 0.21020500  |
| C | -0.59834300 | 3.47100300  | -1.00554200 |
| O | -1.97709100 | 3.73985900  | -0.69715400 |
| C | -1.68445700 | 3.32304100  | 1.71487900  |
| C | -2.54420400 | 3.14506700  | 0.44940800  |
| C | -0.21372000 | 2.92975300  | 1.47678100  |
| C | -0.48287500 | 2.12697800  | -1.76484700 |
| O | 0.41001600  | 5.03825900  | 0.45923000  |
| O | -0.13136700 | 1.49141700  | 1.35592700  |
| H | 0.38280600  | 3.24173900  | 2.33974900  |
| H | 1.31314900  | 3.22805900  | -0.04001200 |
| H | -2.10860400 | 2.69207700  | 2.50134100  |
| O | -1.75498800 | 4.65929200  | 2.17346200  |
| H | -3.51224000 | 3.62898400  | 0.57931500  |
| O | -2.73738800 | 1.74194400  | 0.25071000  |
| C | -3.99481800 | 1.24994300  | -0.00889100 |
| O | -5.00205900 | 1.91905400  | 0.06797200  |
| C | -3.91610900 | -0.17955800 | -0.39604200 |
| C | -5.09017000 | -0.86386900 | -0.74002200 |
| C | -5.00675500 | -2.18227000 | -1.18304800 |
| C | -3.75369500 | -2.80303400 | -1.30355400 |
| C | -2.58649000 | -2.11432700 | -0.95919200 |
| C | -2.66867300 | -0.81524000 | -0.47744000 |
| O | -6.13690600 | -2.86278800 | -1.52894300 |
| O | -3.71623400 | -4.08389200 | -1.78449700 |
| O | -1.40777100 | -2.79579500 | -1.12986900 |
| H | -0.32179600 | 4.28469100  | -1.68195100 |
| H | -6.05340100 | -0.37005800 | -0.68382800 |
| H | -1.76617300 | -0.30060800 | -0.18699200 |
| H | -5.86531300 | -3.73855700 | -1.85331600 |
| H | -2.77712500 | -4.31344400 | -1.90348800 |
| H | -0.68140200 | -2.14527400 | -1.21978300 |
| O | 0.90066300  | 1.70406900  | -1.76521100 |
| C | 1.16168200  | 0.39700900  | -1.51502000 |
| H | -1.09390600 | 1.35896300  | -1.30438700 |
| H | -0.80901200 | 2.26040800  | -2.80021100 |
| H | 1.12694300  | 5.18273900  | 1.09827000  |
| H | -1.25627700 | 5.19892400  | 1.52997000  |
| C | 1.10032500  | 0.92400000  | 1.51560500  |
| O | 0.29999200  | -0.46638600 | -1.54963800 |
| C | 2.59443100  | 0.17715000  | -1.18645600 |
| C | 3.56419900  | 0.86340300  | -1.92888200 |
| C | 4.92252700  | 0.63404100  | -1.72688100 |
| C | 5.31610800  | -0.30781600 | -0.76538400 |
| C | 4.34268600  | -0.97125900 | -0.00352900 |
| C | 2.97104000  | -0.72899900 | -0.16659500 |
| H | 3.24812000  | 1.56877400  | -2.69224400 |
| O | 5.90950300  | 1.25218600  | -2.43495200 |
| O | 6.62850800  | -0.57067400 | -0.57104900 |
| O | 4.85847800  | -1.83752000 | 0.93271600  |

|   |             |             |             |
|---|-------------|-------------|-------------|
| C | 1.97148600  | -1.33741200 | 0.75678900  |
| C | 1.88974100  | -2.72911800 | 0.89876700  |
| C | 0.88144500  | -3.34048100 | 1.64454800  |
| C | -0.09583000 | -2.56347000 | 2.26493200  |
| C | -0.02409800 | -1.17808600 | 2.17869900  |
| C | 1.00987600  | -0.56852600 | 1.45542000  |
| O | 2.82011700  | -3.53331400 | 0.27942200  |
| O | 0.88476600  | -4.70593800 | 1.70340900  |
| O | -1.05201800 | -3.27006100 | 2.94762900  |
| H | -0.76319600 | -0.56223300 | 2.68068600  |
| O | 2.10876600  | 1.56768800  | 1.70627900  |
| H | 5.50203200  | 1.86486300  | -3.06670900 |
| H | 6.65874500  | -1.25233800 | 0.12758900  |
| H | 4.34709900  | -2.67104700 | 0.87975200  |
| H | 2.56539400  | -4.45993900 | 0.44258200  |
| H | 0.06555300  | -4.98999200 | 2.14522100  |
| H | -1.79302200 | -2.68812400 | 3.17664600  |

### Conf1a $\beta$ -configured corilagin

# B3LYP/PCM(DMSO)/6-311G(d,p) SPE

Total energy = -1504028.255 kcal/mol

|   |             |             |             |
|---|-------------|-------------|-------------|
| C | -0.03790000 | -2.18090000 | 0.83310000  |
| C | 0.63320000  | -2.14000000 | -0.55400000 |
| O | 1.90480000  | -1.46970000 | -0.54180000 |
| C | 1.63810000  | -0.39650000 | 1.62120000  |
| C | 2.50920000  | -1.27980000 | 0.72330000  |
| C | 0.16160000  | -0.87590000 | 1.61660000  |
| C | -0.16690000 | -1.39370000 | -1.63870000 |
| O | 0.55450000  | -3.18450000 | 1.65970000  |
| O | -0.63570000 | 0.18690000  | 1.03290000  |
| H | -0.16760000 | -1.04220000 | 2.64400000  |
| H | -1.10590000 | -2.37300000 | 0.70720000  |
| H | 1.66240000  | 0.61890000  | 1.20600000  |
| O | 2.21570000  | -0.44410000 | 2.91650000  |
| H | 2.73970000  | -2.23090000 | 1.20530000  |
| O | 3.70900000  | -0.56640000 | 0.47130000  |
| C | 4.82860000  | -1.30020000 | 0.20070000  |
| O | 4.83790000  | -2.51750000 | 0.19170000  |
| C | 6.00620000  | -0.44400000 | -0.06940000 |
| C | 5.92900000  | 0.95610000  | -0.04170000 |
| C | 7.06910000  | 1.71140000  | -0.30430000 |
| C | 8.28120000  | 1.07130000  | -0.59390000 |
| C | 8.35190000  | -0.32880000 | -0.62070000 |
| C | 7.21960000  | -1.09000000 | -0.35940000 |
| O | 7.00390000  | 3.07390000  | -0.27920000 |
| O | 9.36630000  | 1.85870000  | -0.84360000 |
| O | 9.59190000  | -0.82850000 | -0.91680000 |
| H | 0.79100000  | -3.18250000 | -0.86490000 |
| H | 4.99780000  | 1.46200000  | 0.17990000  |
| H | 7.25960000  | -2.17410000 | -0.37710000 |
| H | 7.88950000  | 3.42290000  | -0.48390000 |

|   |             |             |             |
|---|-------------|-------------|-------------|
| H | 10.13060000 | 1.28310000  | -1.02500000 |
| H | 9.57300000  | -1.79890000 | -0.91730000 |
| O | -1.56470000 | -1.71360000 | -1.49230000 |
| C | -2.44580000 | -0.70050000 | -1.70350000 |
| H | -0.03090000 | -0.31870000 | -1.52450000 |
| H | 0.17230000  | -1.68800000 | -2.63580000 |
| H | 0.36850000  | -4.05000000 | 1.26080000  |
| H | 1.87880000  | 0.31050000  | 3.42500000  |
| C | -1.95920000 | 0.21910000  | 1.33710000  |
| O | -2.14480000 | 0.34050000  | -2.25210000 |
| C | -3.77950000 | -1.02170000 | -1.11940000 |
| C | -4.34880000 | -2.27850000 | -1.35200000 |
| C | -5.60480000 | -2.59520000 | -0.83450000 |
| C | -6.27680000 | -1.65740000 | -0.03950000 |
| C | -5.68060000 | -0.41610000 | 0.21840000  |
| C | -4.43690000 | -0.05980000 | -0.32200000 |
| H | -3.81930000 | -3.00820000 | -1.95720000 |
| O | -6.23300000 | -3.78730000 | -1.04720000 |
| O | -7.49090000 | -1.97470000 | 0.49090000  |
| O | -6.41380000 | 0.39150000  | 1.04500000  |
| C | -3.84000000 | 1.26710000  | 0.01430000  |
| C | -4.43350000 | 2.44150000  | -0.48500000 |
| C | -3.86170000 | 3.69660000  | -0.24440000 |
| C | -2.64290000 | 3.81100000  | 0.42540000  |
| C | -2.01860000 | 2.65840000  | 0.90890000  |
| C | -2.62490000 | 1.41390000  | 0.72470000  |
| O | -5.57330000 | 2.36020000  | -1.21890000 |
| O | -4.45830000 | 4.82830000  | -0.79070000 |
| O | -2.06680000 | 5.02390000  | 0.61440000  |
| H | -1.07660000 | 2.74620000  | 1.43720000  |
| O | -2.51110000 | -0.61390000 | 2.02680000  |
| H | -5.67090000 | -4.34550000 | -1.60910000 |
| H | -7.77750000 | -1.21540000 | 1.03000000  |
| H | -5.90160000 | 1.19030000  | 1.25800000  |
| H | -5.77800000 | 3.26300000  | -1.52950000 |
| H | -5.07690000 | 5.21520000  | -0.14430000 |
| H | -2.60390000 | 5.68110000  | 0.13350000  |

**Conf1b**  $\beta$ -configured corilagin

# CAM-B3LYP/PCM(DMSO)/6-311G(d,p) SPE

Total energy = -1504027.195 kcal/mol

|   |             |             |             |
|---|-------------|-------------|-------------|
| C | -0.52120000 | -3.05710000 | 0.60130000  |
| C | 0.29790000  | -2.87320000 | -0.71690000 |
| O | 1.23360000  | -1.79290000 | -0.59310000 |
| C | 1.05920000  | -1.36760000 | 1.75450000  |
| C | 1.94950000  | -1.87550000 | 0.62320000  |
| C | -0.41110000 | -1.82450000 | 1.51440000  |
| C | -0.53140000 | -2.62300000 | -1.99300000 |
| O | 0.00630000  | -4.12420000 | 1.38960000  |
| O | -1.15610000 | -0.75110000 | 0.88500000  |
| H | -0.86740000 | -2.06140000 | 2.47690000  |

|   |             |             |             |
|---|-------------|-------------|-------------|
| H | -1.57480000 | -3.23270000 | 0.36730000  |
| H | 1.08610000  | -0.27280000 | 1.71750000  |
| O | 1.58440000  | -1.84710000 | 2.97820000  |
| H | 2.28900000  | -2.89910000 | 0.80950000  |
| O | 3.06610000  | -1.00960000 | 0.51840000  |
| C | 4.18520000  | -1.51350000 | -0.08440000 |
| O | 4.25560000  | -2.65800000 | -0.49290000 |
| C | 5.27510000  | -0.51560000 | -0.16780000 |
| C | 5.12910000  | 0.78830000  | 0.32790000  |
| C | 6.18920000  | 1.68500000  | 0.22190000  |
| C | 7.38970000  | 1.28180000  | -0.37770000 |
| C | 7.52900000  | -0.02260000 | -0.87260000 |
| C | 6.47730000  | -0.92410000 | -0.76920000 |
| O | 6.05650000  | 2.95560000  | 0.70060000  |
| O | 8.39460000  | 2.20020000  | -0.45710000 |
| O | 8.74860000  | -0.28910000 | -1.43520000 |
| H | 0.87240000  | -3.79950000 | -0.86480000 |
| H | 4.20570000  | 1.11240000  | 0.79110000  |
| H | 6.57190000  | -1.93690000 | -1.14640000 |
| H | 6.89080000  | 3.42970000  | 0.53600000  |
| H | 9.15550000  | 1.78750000  | -0.90320000 |
| H | 8.77170000  | -1.19820000 | -1.77510000 |
| O | -1.88690000 | -2.25290000 | -1.69740000 |
| C | -2.23450000 | -0.93920000 | -1.69940000 |
| H | -0.05110000 | -1.85060000 | -2.59610000 |
| H | -0.61080000 | -3.54510000 | -2.57090000 |
| H | -0.17950000 | -4.95550000 | 0.92470000  |
| H | 1.16050000  | -1.34270000 | 3.69180000  |
| C | -1.42230000 | 0.32040000  | 1.66620000  |
| O | -1.52790000 | -0.05340000 | -2.13540000 |
| C | -3.57940000 | -0.77360000 | -1.08240000 |
| C | -4.53590000 | -1.78460000 | -1.24720000 |
| C | -5.79860000 | -1.67930000 | -0.66710000 |
| C | -6.10060000 | -0.56160000 | 0.12050000  |
| C | -5.13170000 | 0.43460000  | 0.29720000  |
| C | -3.86350000 | 0.36370000  | -0.30090000 |
| H | -4.29430000 | -2.66060000 | -1.84000000 |
| O | -6.77790000 | -2.61890000 | -0.80960000 |
| O | -7.32530000 | -0.46120000 | 0.70730000  |
| O | -5.54130000 | 1.46880000  | 1.09640000  |
| C | -2.92950000 | 1.50860000  | -0.06400000 |
| C | -3.17640000 | 2.71250000  | -0.75450000 |
| C | -2.43050000 | 3.86680000  | -0.49220000 |
| C | -1.39970000 | 3.85040000  | 0.44800000  |
| C | -1.14040000 | 2.67400000  | 1.15180000  |
| C | -1.88470000 | 1.51790000  | 0.88770000  |
| O | -4.16460000 | 2.75800000  | -1.68410000 |
| O | -2.67770000 | 5.01580000  | -1.23600000 |
| O | -0.65780000 | 4.96090000  | 0.68670000  |
| H | -0.34560000 | 2.65870000  | 1.88830000  |
| O | -1.18850000 | 0.34340000  | 2.86060000  |
| H | -6.44480000 | -3.33870000 | -1.37000000 |
| H | -7.33320000 | 0.36870000  | 1.21780000  |
| H | -4.80220000 | 2.08790000  | 1.22820000  |
| H | -4.14180000 | 3.65000000  | -2.08040000 |
| H | -3.30100000 | 5.58950000  | -0.75340000 |

H

-0.92970000

5.64020000

0.04190000
